# Supplementary material for: Genus-Specific Real-Time PCR and HRM Assays to Distinguish Liriope from Ophiopogon Samples
Source: MDPI journal article supplement (doi:10.3390/plants6040053), 2017-10-26
Supplement: s1 [file s1]

**Table S1.** Samples taken from accessions in the UK National Collections of *Liriope* and *Ophiopogon*.

| Sample Number | Accession number<br>Brooksby Melton College | Genus             | Species                     | Cultivar/hybrid             | SNP |
|---------------|---------------------------------------------|-------------------|-----------------------------|-----------------------------|-----|
| 624           | 1996-54                                     | <i>Liriope</i>    | <i>exiliflora</i>           |                             | A   |
| 625           | 1996-02                                     | <i>Liriope</i>    | <i>graminifolia</i>         | Alba                        | A   |
| 626           | 1996-03                                     | <i>Liriope</i>    | <i>graminifolia</i>         | Intermedia                  | A   |
| 627           | 1996-05                                     | <i>Liriope</i>    | <i>graminifolia</i>         | Koreana                     | A   |
| 628           | 1996-04                                     | <i>Liriope</i>    | <i>graminifolia</i>         | Pre Alba                    | G   |
| 630           | 1996-01                                     | <i>Liriope</i>    | <i>graminifolia</i>         |                             | A   |
| 631           | 1996-46                                     | <i>Liriope</i>    | <i>minor</i>                |                             | A   |
| 632           | 1996-47                                     | <i>Liriope</i>    | <i>Or Ophiopogon herifu</i> |                             | A   |
| 633           | 1997-43                                     | <i>Liriope</i>    | <i>muscaria</i>             | 1103                        | A   |
| 634           | 1998-25                                     | <i>Liriope</i>    | <i>muscaria</i>             | 'Monroe White'              | A   |
| 636           | 1998-31                                     | <i>Liriope</i>    | <i>muscaria</i>             | 'Silver Ribband'            | A   |
| 637           | 1996-07                                     | <i>Liriope</i>    | <i>muscaria</i>             | Alba                        | A   |
| 638           | 1996-08                                     | <i>Liriope</i>    | <i>muscaria</i>             | Big Blue Riegal             | A   |
| 639           | 1996-09                                     | <i>Liriope</i>    | <i>muscaria</i>             | Big Blue Tidwell            | A   |
| 640           | 1996-10                                     | <i>Liriope</i>    | <i>muscaria</i>             | Blue Spire                  | A   |
| 641           | 1996-40                                     | <i>Liriope</i>    | <i>muscaria</i>             | BSWJ 561                    | A   |
| 642           | 1997-11                                     | <i>Liriope</i>    | <i>muscaria</i>             | Crested White               | A   |
| 643           | 1996-12                                     | <i>Liriope</i>    | <i>muscaria</i>             | Curly Twist                 | A   |
| 644           | 1996-13                                     | <i>Liriope</i>    | <i>muscaria</i>             | Densiflora                  | A   |
| 645           | 1996-14                                     | <i>Liriope</i>    | <i>muscaria</i>             | Exaltation                  | A   |
| 646           | 1996-15                                     | <i>Liriope</i>    | <i>muscaria</i>             | Franklin Mint               | A   |
| 647           | 1996-16                                     | <i>Liriope</i>    | <i>muscaria</i>             | Gigantea                    | A   |
| 648           | 1996-17                                     | <i>Liriope</i>    | <i>muscaria</i>             | Gilner White                | A   |
| 649           | 1996-18                                     | <i>Liriope</i>    | <i>muscaria</i>             | Gold Banded                 | A   |
| 651           | 1996-42                                     | <i>Liriope</i>    | <i>muscaria</i>             | Grandiflora                 | A   |
| 652           | 1996-19                                     | <i>Liriope</i>    | <i>muscaria</i>             | Green Midget                | A   |
| 653           | 1996-20                                     | <i>Liriope</i>    | <i>muscaria</i>             | Hawk Feathers               | A   |
| 654           | 1996-21                                     | <i>Liriope</i>    | <i>muscaria</i>             | Ingwersens variety.         | A   |
| 655           | 1996-22                                     | <i>Liriope</i>    | <i>muscaria</i>             | John Burch                  | A   |
| 656           | 1996-23                                     | <i>Liriope</i>    | <i>muscaria</i>             | Majestic                    | A   |
| 657           | 1996-26                                     | <i>Liriope</i>    | <i>muscaria</i>             | New Wonder                  | A   |
| 660           | 1996-28                                     | <i>Liriope</i>    | <i>muscaria</i>             | Purple Bouquet              | A   |
| 661           | 1996-52                                     | <i>Liriope</i>    | <i>muscaria</i>             | Rocket                      | A   |
| 662           | 1996-49                                     | <i>Liriope</i>    | <i>muscaria</i>             | Royal Purple                | A   |
| 663           | 1997-29                                     | <i>Liriope</i>    | <i>muscaria</i>             | Samantha                    | A   |
| 664           | 1997-30                                     | <i>Liriope</i>    | <i>muscaria</i>             | Sheffield                   | A   |
| 665           | 1996-50                                     | <i>Liriope</i>    | <i>muscaria</i>             | Silver Banded/Silver Dragon | A   |
| 666           | 1998-32                                     | <i>Liriope</i>    | <i>muscaria</i>             | Silver variegated           | A   |
| 667           | 1997-37                                     | <i>Liriope</i>    | <i>muscaria</i>             | Silvery Midget              | G   |
| 668           | 1996-33                                     | <i>Liriope</i>    | <i>muscaria</i>             | Sun Proof                   | A   |
| 669           | 1998-34                                     | <i>Liriope</i>    | <i>muscaria</i>             | Superba                     | A   |
| 670           | 1996-38                                     | <i>Liriope</i>    | <i>muscaria</i>             | Variegata alba              | A   |
| 673           | 1996-41                                     | <i>Liriope</i>    | <i>muscaria</i>             | Wonder Evergreen            | A   |
| 674           | 1996-35                                     | <i>Liriope</i>    | <i>muscaria</i>             | Xmas Tree                   | A   |
| 675           | 1996-06                                     | <i>Liriope</i>    | <i>muscaria</i>             |                             | A   |
| 676           | 1997-45                                     | <i>Liriope</i>    | <i>spicata</i>              | Alba                        | A   |
| 677           | 1998-44                                     | <i>Liriope</i>    | <i>spicata</i>              |                             | G   |
| 678           | 1996-01                                     | <i>Ophiopogon</i> | <i>bodinieri</i>            |                             | G   |
| 679           | 1996-02                                     | <i>Ophiopogon</i> | <i>chingii</i>              |                             | G   |
| 680           | 1996-03                                     | <i>Ophiopogon</i> | <i>clarkei</i>              |                             | G   |

|     |          |                   |                     |                   |   |
|-----|----------|-------------------|---------------------|-------------------|---|
| 682 | 1996-05  | <i>Ophiopogon</i> | <i>intermedius</i>  | Shiroshiga Ryu    | G |
| 683 | 1997-29  | <i>Ophiopogon</i> | <i>intermedius</i>  | variegatus        | G |
| 684 | 1996-04  | <i>Ophiopogon</i> | <i>Intermedius</i>  |                   | G |
| 685 | 1997 -07 | <i>Ophiopogon</i> | <i>jaburan</i>      | Variegatus        | G |
| 686 | 1997-27  | <i>Ophiopogon</i> | <i>jaburan</i>      |                   | G |
| 688 | 1997-09  | <i>Ophiopogon</i> | <i>japonicus</i>    | Compactus         | G |
| 690 | 1996-12  | <i>Ophiopogon</i> | <i>japonicus</i>    | Little Tabby      | G |
| 691 | 1997-10  | <i>Ophiopogon</i> | <i>japonicus</i>    | Nippon            | G |
| 692 | 1997-11  | <i>Ophiopogon</i> | <i>japonicus</i>    | Tama ryu number 2 | G |
| 693 | 1998-31  | <i>Ophiopogon</i> | <i>japonicus</i>    | Torafu            | A |
| 695 | 1996-08  | <i>Ophiopogon</i> | <i>japonicus</i>    |                   | A |
| 697 | 1998-33  | <i>Ophiopogon</i> | <i>planiscapus</i>  | 'Black Dragon'    | G |
| 698 | 1998-32  | <i>Ophiopogon</i> | <i>planiscapus</i>  | 'Silver Edge'     | G |
| 699 | 2001-34  | <i>Ophiopogon</i> | <i>planiscapus</i>  | Black beard       | G |
| 700 | 1996-16  | <i>Ophiopogon</i> | <i>planiscapus</i>  | Leucanthus        | G |
| 701 | 1996-15  | <i>Ophiopogon</i> | <i>planiscapus</i>  | Nigrescens        | G |
| 702 | 1996-14  | <i>Ophiopogon</i> | <i>planiscapus</i>  |                   | G |
| 703 | 1996-17  | <i>Ophiopogon</i> | <i>Sp. DF 86128</i> |                   | G |
| 704 | 1996-19  | <i>Ophiopogon</i> | <i>wallichianus</i> |                   | G |
| 705 | 1997-25  | <i>Ophiopogon</i> |                     | 'Buncho'          | G |
| 706 | 1997-20  | <i>Ophiopogon</i> |                     | 'Fuko-ho-ryu'     | G |
| 708 | 1997-21  | <i>Ophiopogon</i> |                     | 'Rhyuko'          | G |
| 709 | 1997-22  | <i>Ophiopogon</i> |                     | 'Spring Gold'     | A |
| 711 | 1996-18  | <i>Ophiopogon</i> |                     | Stephen Tappler   | A |

Figure S1 supplied in pdf format

**Figure S1.** Multiple alignment of the *rbcLa* region of all of the *Liriope* and *Ophiopogon* samples tested. The first group of sequences represents reference sequences from the GenBank database.

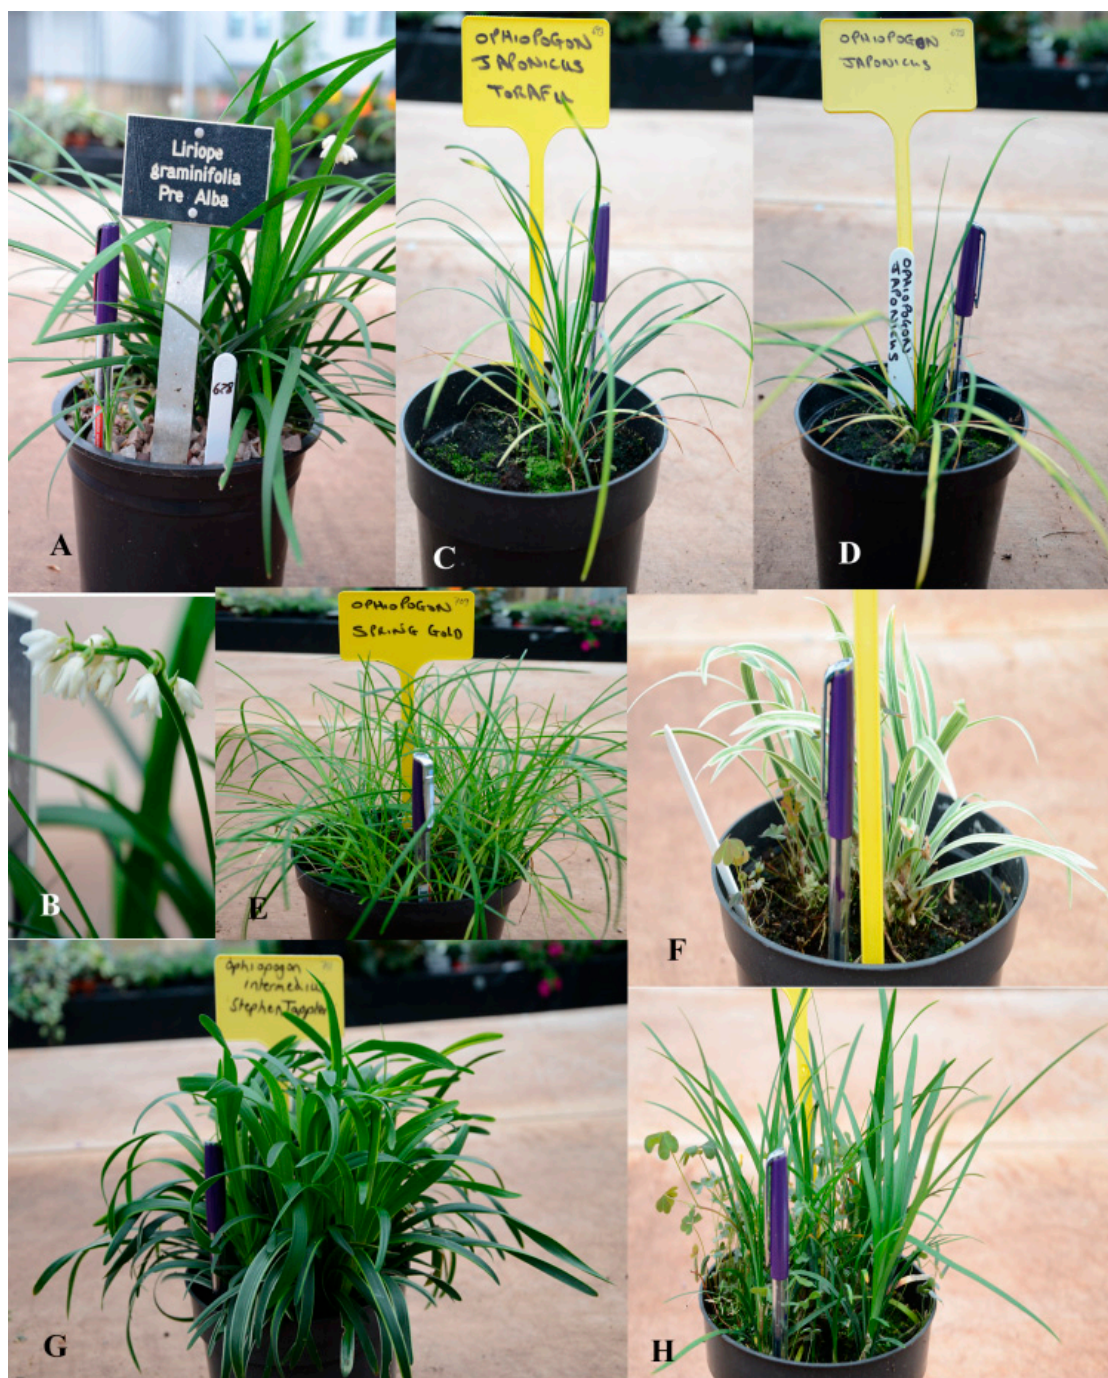

**Figure S2.** Photographs of misidentified specimens attributed to the incorrect genus. The original incorrect names are listed here. (A,B) Sample 628: *Liriope graminifolia*; (C) Sample 693: *Ophiopogon japonicus*; (D) Sample 695: *Ophiopogon japonicus*; (E) Sample 709: *Ophiopogon japonicus*; (F) Sample 667: *Liriope muscari*; (G) Sample 711: *Ophiopogon intermedius*; (H) Sample 677: *Liriope spicata*.

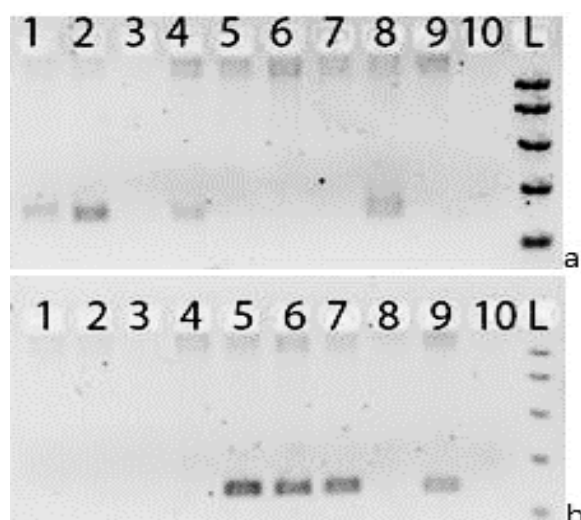

**Figure S3.** Agarose gel electrophoresis of PCR products of a re-sampled specimens using *Ophiopogon*- and *Liriope*-specific primers. (a) Testing the new collection of samples with *Liriope*-specific primers. (b) Testing the new collection of samples with *Ophiopogon*-specific primers. Gel lanes: 1. *Ophiopogon* Sample 693; 2. *Ophiopogon* Sample 695; 3. *Ophiopogon* Sample 709; 4. *Ophiopogon* Sample 711; 5. *Liriope* Sample 628; 6. *Liriope* Sample 667; 7. *Liriope* Sample 677; 8. *Liriope* Sample 625; 9. *Ophiopogon* Sample 692; 10. Negative (no template) control; L. Easy Ladder I (Bioline).

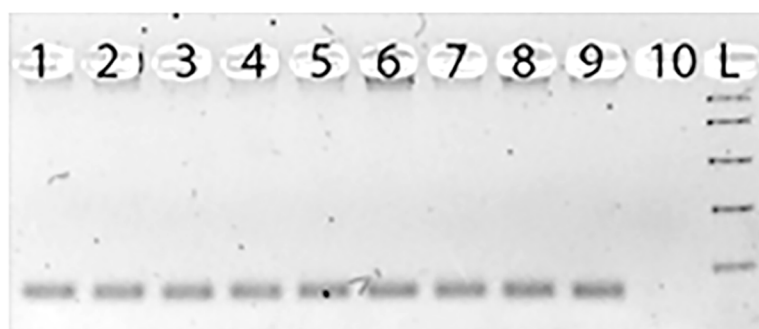

**Figure S4.** Agarose gel electrophoresis of PCR products using HRM primers. Gel lanes: 1. *Ophiopogon* Sample 678; 2. *Ophiopogon* Sample 679; 3. *Ophiopogon* Sample 693; 4. *Ophiopogon* Sample 695; 5. *Ophiopogon* Sample 709; 6. *Ophiopogon* Sample 711; 7. *Liriope* Sample 624; 8. *Liriope* Sample 628; 9. *Liriope* Sample 677; 10. Negative (no template) control; L. Easy Ladder I (Bioline).

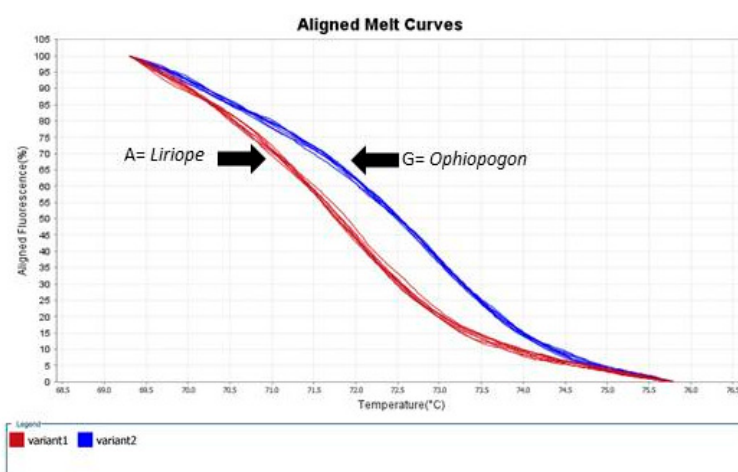

**Figure S5.** HRM assay. The melting curve plot shows two distinct variants. Variant 1: *Liriope* samples; Variant 2: *Ophiopogon* samples.
