# Supplementary figures and images for: Genus-Specific Real-Time PCR and HRM Assays to Distinguish Liriope from Ophiopogon Samples
Source: MDPI journal article supplement (doi:10.3390/plants6040053), 2017-10-26

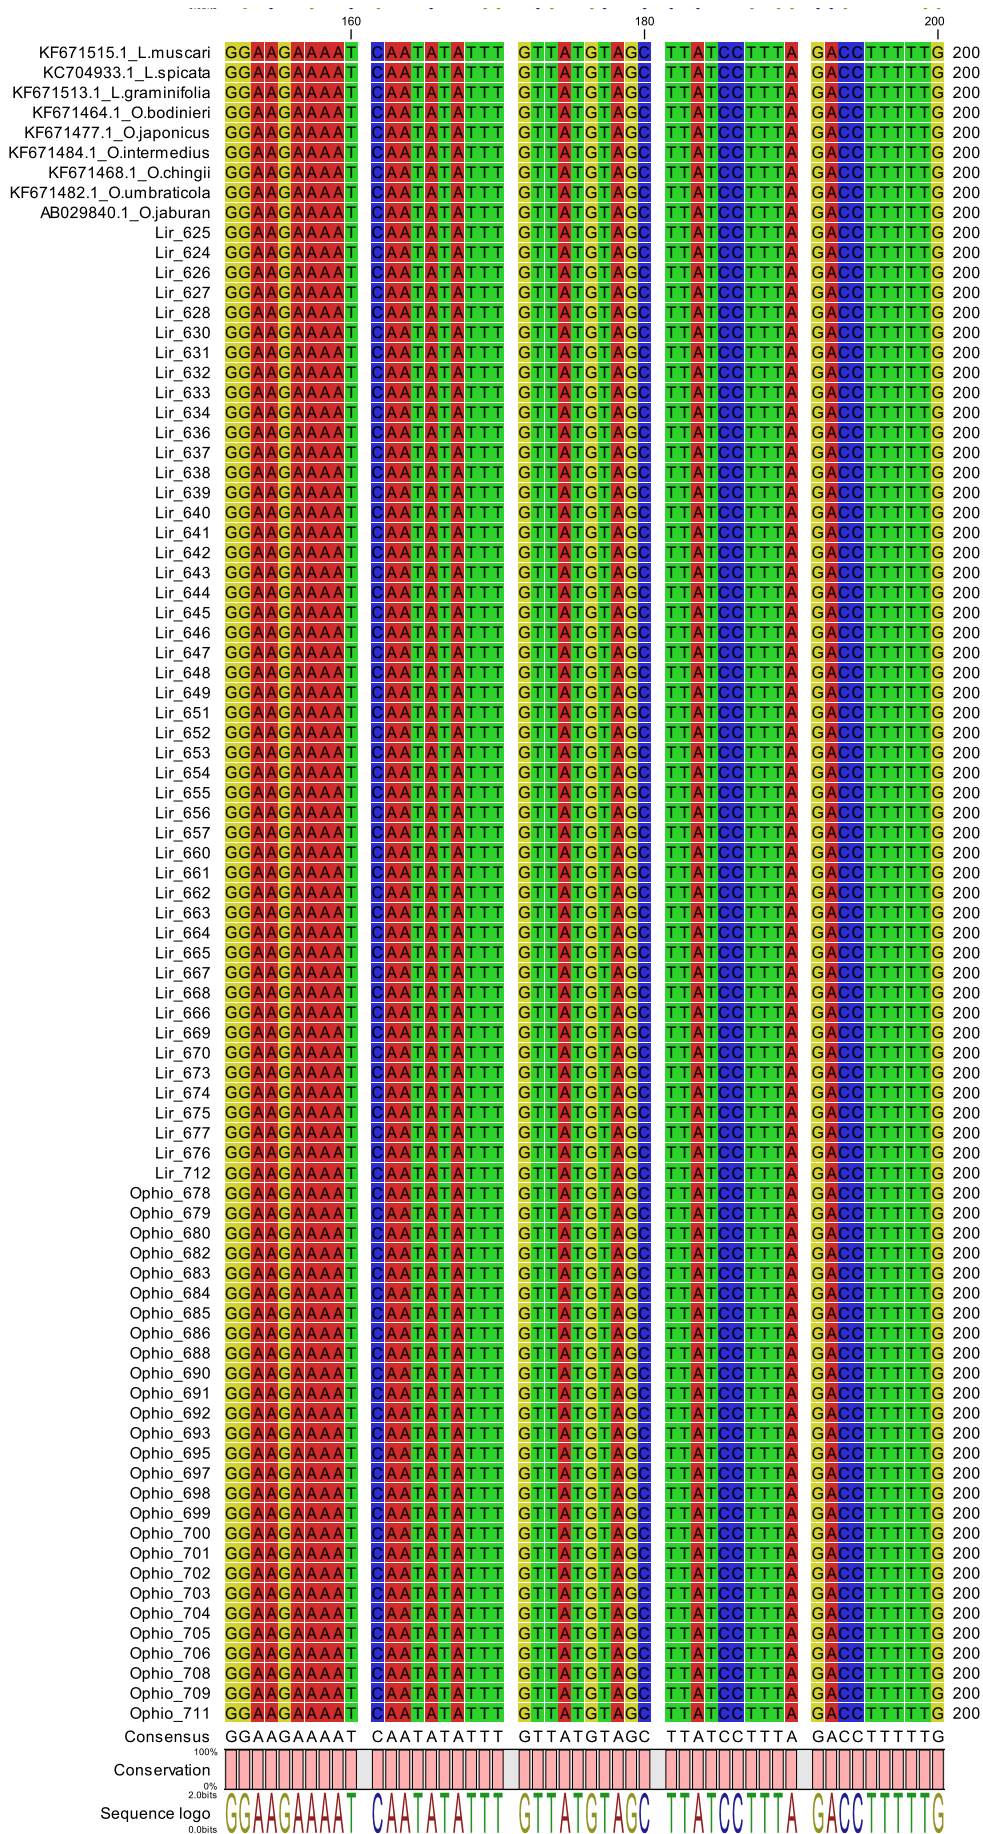



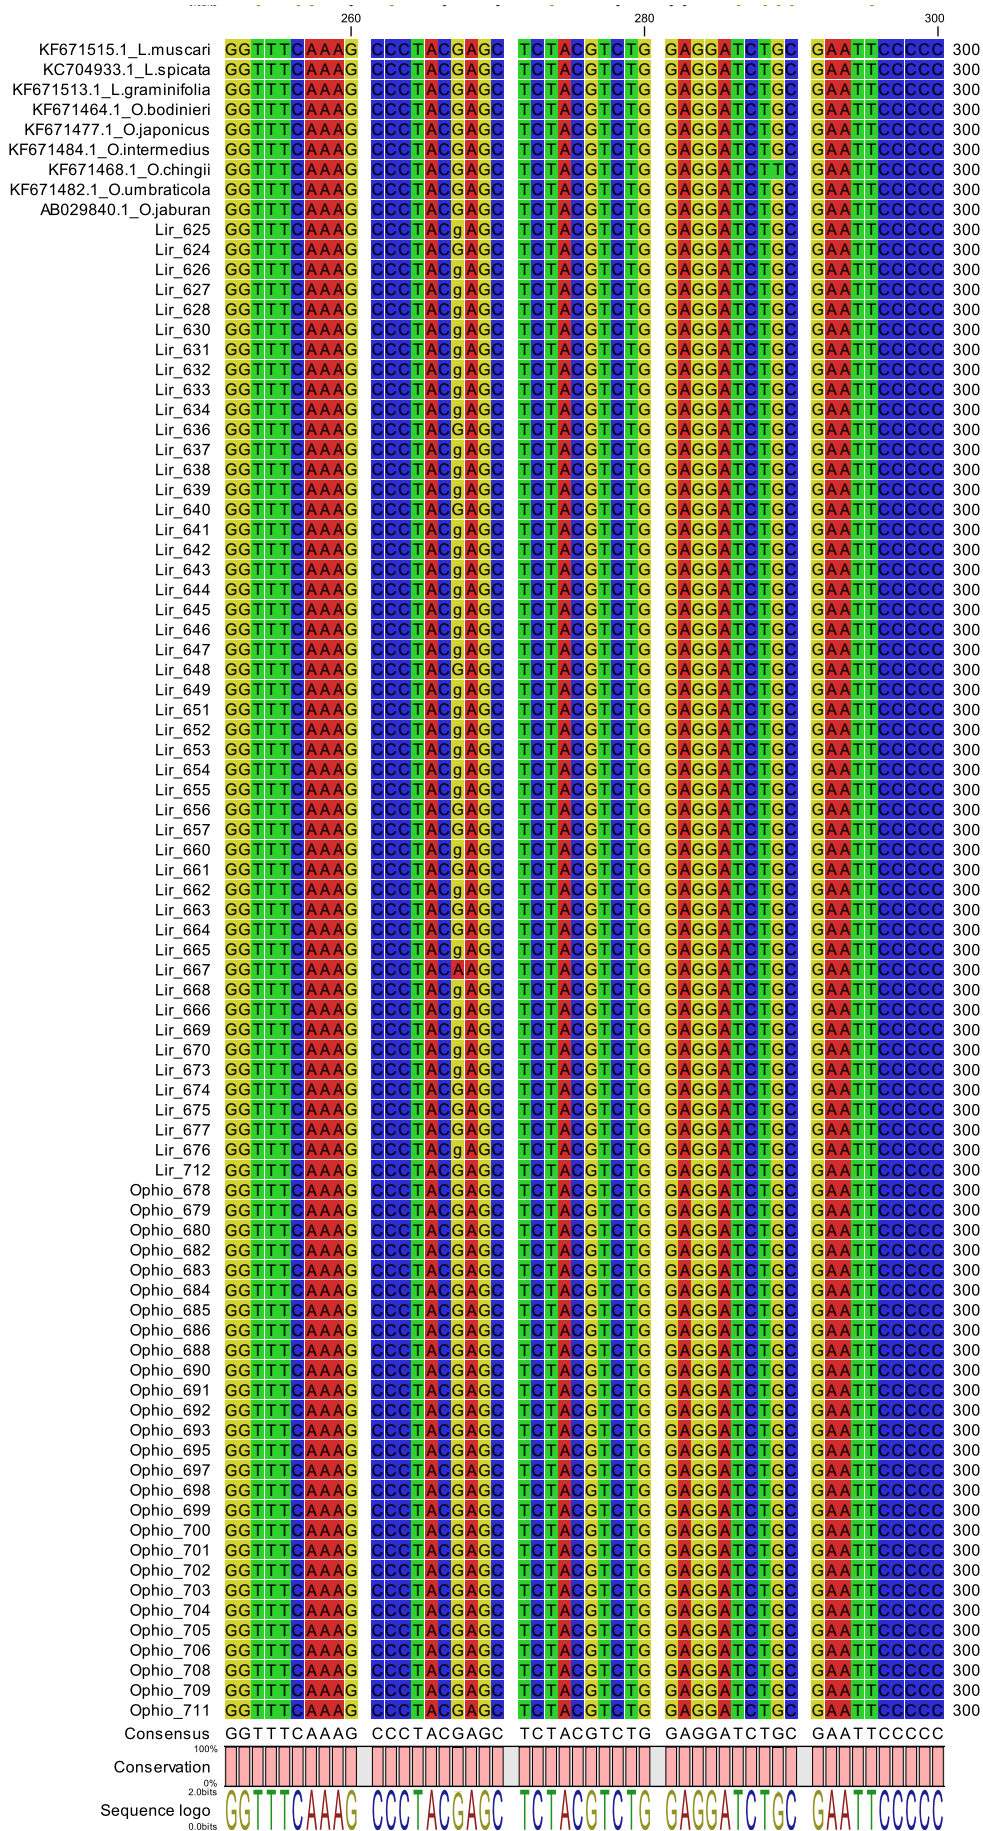

Supplement: s1 [file s1]
